# Supplementary material
Source: publisher site journal article supplement (https://www.dovepress.com/article/102198)
Supplement: Supplementary file 1 [file get_supplementary_file.php%3Ff%3D102198.pdf]

## Additional file 1. Full search strategy

Ovid Embase (1995 to 2015 week 16)

1. medicine.mp. or exp medicine/
2. medication.mp. or exp drug therapy/
3. medication.mp. or exp drug therapy/
4. exp patient/ or exp inappropriate prescribing/ or exp prescription/ or prescri\$.mp. or exp treatment planning/
5. drug.mp. or exp drug administration/ or exp drug/ or exp drug self administration/ or "drug toxicity and intoxication"/ or adverse drug reaction/ or drug interaction/ or exp repeated drug dose/ or exp "drug use"/ or new drug/ or drug administration route/ or drug underdose/ or topical drug administration/ or generic drug/ or exp drug dosage form/ or exp drug effect/ or multiple drug dose/ or "food and drug administration"/ or food drug interaction/ or exp drug labeling/ or auricular drug administration/ or herb drug interaction/ or low drug dose/ or exp prescription drug/ or long acting drug/ or acute drug administration/ or exp drug efficacy/ or exp drug dose/ or drug choice/ or exp chronic drug administration/ or exp "drug cost"/ or drug quality/ or exp recommended drug dose/ or drug potency/
6. therapy/ or drugs/ or polypharmacy/ or treatment/ or prescription drugs/
7. (therapy adj3 (drug\$ or medic\$)).mp. [mp=title, abstract, subject headings, heading word, drug trade name, original title, device manufacturer, drug manufacturer, device trade name, keyword]
8. pharmaceutical therapy.mp.
9. (pharmaceutical adj3 therapy).mp. [mp=title, abstract, subject headings, heading word, drug trade name, original title, device manufacturer, drug manufacturer, device trade name, keyword]
10. polypharmacy/ or exp drug therapy/
11. \*treatment outcome/ or treatment duration/ or \*treatment failure/ or exp time to treatment/ or \*treatment planning/ or \*treatment indication/ or \*treatment refusal/ or treatment.mp. or exp treatment contraindication/ or topical treatment/
12. (prescription adj3 medicine\$).mp. [mp=title, abstract, subject headings, heading word, drug trade name, original title, device manufacturer, drug manufacturer, device trade name, keyword]
13. drug seeking behavior/ or exp drug self administration/
14. exp patient/ or \*attitude/ or \*attitude to health/ or Drug Us\$ Attitude\$.mp. or exp prescription/
15. ((Drug or medicine) adj3 dos\$).mp. [mp=title, abstract, subject headings, heading word, drug trade name, original title, device manufacturer, drug manufacturer, device trade name, keyword]
16. side effect/ or side effect assessment/
17. exp Choice Behavior/ or exp Drug Therapy/ or exp Health Care Costs/ or prescription drug\*.mp. or exp Consumer Attitudes/ or exp Consumer Behavior/ or exp Prescription Drugs/ or Physicians/ or Health Promotion/ or exp Drug Usage/
18. exp "Medical Treatment (General)"/ or exp Drug Therapy/ or regular medicine\*.mp.
19. exp Treatment Compliance/ or exp Drug Therapy/ or regimen.mp. or exp Drug Dosages/
20. exp Polypharmacy/ or exp Prescription Drugs/ or exp Drug Therapy/ or exp Coping Behavior/ or exp Treatment Compliance/ or multiple medicine\$.mp.

21. (excessive adj3 medicine\$).mp. [mp=title, abstract, subject headings, heading word, drug trade name, original title, device manufacturer, drug manufacturer, device trade name, keyword]
22. exp Drug Therapy/ or unnecessary medicine\$.mp.
23. (tak\$ adj3 medicine\$).mp. [mp=title, abstract, subject headings, heading word, drug trade name, original title, device manufacturer, drug manufacturer, device trade name, keyword]
24. (Medicine adj3 us\$).mp. [mp=title, abstract, subject headings, heading word, drug trade name, original title, device manufacturer, drug manufacturer, device trade name, keyword]
25. (taking adj3 medicine\$).mp. [mp=title, abstract, subject headings, heading word, drug trade name, original title, device manufacturer, drug manufacturer, device trade name, keyword]
26. (administ\$ adj3 medicine\$).mp. [mp=title, abstract, subject headings, heading word, drug trade name, original title, device manufacturer, drug manufacturer, device trade name, keyword]
27. (self adj3 medic\$).mp. [mp=title, abstract, subject headings, heading word, drug trade name, original title, device manufacturer, drug manufacturer, device trade name, keyword]
28. (medicine\$ adj manag\$).mp. [mp=title, abstract, subject headings, heading word, drug trade name, original title, device manufacturer, drug manufacturer, device trade name, keyword]
29. or/1-28
30. (instrument\$ or tool\$ or scale\* or indicator\$ or technique or method\$ or form\$ or survey\* or questionnaire\$ or self report or measure or (patient adj3 report\$) or outcome measure or PROM or PRO or quantif\$ or rate or rating or assess\$ or evaluat\$ or estimat\$ or develop\$ or valid\$ or reliab\$ or psychometr\$).mp. [mp=title, abstract, subject headings, heading word, drug trade name, original title, device manufacturer, drug manufacturer, device trade name, keyword]
31. (patient experience\$ or experienc\$ or view\$ or perception\$ or attitude\$ or belief\$ or concern\$ or worr\$ or burden\$ or (medic\$ adj5 burden\$) or pill burden or problem or distress or (medicin\$ adj3 problem) or (drug adj3 problem) or financial burden or (cost adj3 burden) or psycholog\$ or social activit\$ or family or friend\$ or time or travel or emotion\$ or satisf\$ or dissatisf\$ or happ\$ or unhapp\$ or (cop\$ adj5 medic\$) or (cop\$ adj3 drug\$) or behav\$ or lifestyle or routine or life or activities of daily living).mp. or (\*day/ adj3 lif\$.mp.) or life.mp. or live\$.mp. or health\$.mp. or fitness.mp. or wellbeing.mp. or quality of life.mp. or self care.mp. or impact.mp.
32. \*doctor patient relation/ or \*patient care/ or exp patient attitude/ or \*health care quality/ or exp questionnaire/ or patient/ or exp \*patient satisfaction/ or patient experience\$.mp. or \*psychological aspect/
33. (patient adj3 view\$).mp. [mp=title, abstract, subject headings, heading word, drug trade name, original title, device manufacturer, drug manufacturer, device trade name, keyword]
34. (patient adj3 perception\$).mp. [mp=title, abstract, subject headings, heading word, drug trade name, original title, device manufacturer, drug manufacturer, device trade name, keyword]
35. (patient adj3 attitude\$).mp. [mp=title, abstract, subject headings, heading word, drug trade name, original title, device manufacturer, drug manufacturer, device trade name, keyword]
36. (patient adj3 belief\$).mp. [mp=title, abstract, subject headings, heading word, drug trade name, original title, device manufacturer, drug manufacturer, device trade name, keyword]

37. (patient adj3 concern\$).mp. [mp=title, abstract, subject headings, heading word, drug trade name, original title, device manufacturer, drug manufacturer, device trade name, keyword]
38. (patient adj3 worry\$).mp. [mp=title, abstract, subject headings, heading word, drug trade name, original title, device manufacturer, drug manufacturer, device trade name, keyword]
39. (patient adj3 burden\$).mp. [mp=title, abstract, subject headings, heading word, drug trade name, original title, device manufacturer, drug manufacturer, device trade name, keyword]
40. (patient adj5 satisf\$).mp. [mp=title, abstract, subject headings, heading word, drug trade name, original title, device manufacturer, drug manufacturer, device trade name, keyword]
41. (patients\$ adj3 dissatisf\$).mp. [mp=title, abstract, subject headings, heading word, drug trade name, original title, device manufacturer, drug manufacturer, device trade name, keyword]
42. ((patient\$ adj3 happ\$) or (patient\$ adj3 unhapp\$)).mp. [mp=title, abstract, subject headings, heading word, drug trade name, original title, device manufacturer, drug manufacturer, device trade name, keyword]
43. ((cop\$ adj5 medic\$) or (cop\$ adj5 drug\$) or (medic\$ adj5 behav\$) or (medic\$ adj5 lifestyle) or (medic\$ adj5 routin\$) or (medicine adj5 lif\$) or (medicine\$ adj10 activities of daily living)).mp. or (medicine.mp. adj5 \*day/) or (drug adj5 health\$).mp. or (drug therapy adj10 fitness).mp. or (pharmaceutical therapy adj5 quality of life).mp. or (drug adj5 self care).mp. or (drug\$ adj5 impact).mp.
44. ((cop\$ adj5 medic\$) or (cop\$ adj5 drug\$) or (medic\$ adj5 behav\$) or (medic\$ adj5 lifestyle) or (medic\$ adj5 routin\$) or (medicine adj5 lif\$) or (medicine\$ adj10 activities of daily living)).mp. or (medicine.mp. adj5 \*day/) or (drug adj5 health\$).mp. or (drug therapy adj10 fitness).mp. or (pharmaceutical therapy adj5 quality of life).mp. or (drug adj5 self care).mp. or (drug\$ adj5 impact).mp.
45. ((cop\$ adj5 medic\$) or (cop\$ adj5 drug\$) or (medic\$ adj5 behav\$) or (medic\$ adj5 lifestyle) or (medic\$ adj5 routin\$) or (medicine adj5 lif\$) or (medicine\$ adj5 activities of daily living) or (drug adj5 health\$) or (drug therapy adj5 fit\$) or (pharmaceutical therapy adj3 quality of life) or (drug adj5 self care) or (drug\$ adj5 impact)).mp. [mp=title, abstract, subject headings, heading word, drug trade name, original title, device manufacturer, drug manufacturer, device trade name, keyword]
46. or/31-45
47. 29 and 46
48. 30 and 47
49. develop\$.mp.
50. 48 and 49
51. psychometr\$.mp. [mp=title, abstract, subject headings, heading word, drug trade name, original title, device manufacturer, drug manufacturer, device trade name, keyword]
52. 50 and 51
53. limit 52 to (human and english language and embase and (adult <18 to 64 years> or aged <65+ years>))
54. limit 53 to yr="1995 -Current"

### **PsycINFO and PSych articles**

1. medicine.af.
2. medication.mp. or exp Drug Therapy/

3. "prescribing (drugs)"/ or drug therapy/ or drugs/ or polypharmacy/ or treatment/ or prescription drugs/
4. exp Drug Usage Screening/ or exp Drug Therapy/ or exp Drug Seeking/ or exp Drug Usage Attitudes/ or drug\*.mp. or exp Drug Usage/ or exp Drug Self Administration/ or exp Drug Dosages/ or exp "Side Effects (Drug)"/
5. exp Prescription Privileges/ or exp Prescription Drugs/ or prescription\*.mp.
6. exp Choice Behavior/ or exp Drug Therapy/ or exp Health Care Costs/ or prescription drug\*.mp. or exp Consumer Attitudes/ or exp Consumer Behavior/ or exp Prescription Drugs/ or Physicians/ or Health Promotion/ or exp Drug Usage/
7. (prescription adj3 medicine).mp. [mp=title, abstract, heading word, table of contents, key concepts, original title, tests & measures]
8. exp "Medical Treatment (General)"/ or exp Drug Therapy/ or regular medicine\*.mp.
9. exp Treatment Compliance/ or exp Drug Therapy/ or regimen.mp. or exp Drug Dosages/
10. polypharmacy.mp. or exp Polypharmacy/
11. exp Polypharmacy/ or exp Prescription Drugs/ or exp Drug Therapy/ or exp Coping Behavior/ or exp Treatment Compliance/ or multiple medicine\$.mp.
12. (excessive adj3 medicine\$).mp. [mp=title, abstract, heading word, table of contents, key concepts, original title, tests & measures]
13. exp Drug Therapy/ or unnecessary medicine\$.mp.
14. drug therapy.mp. or exp Drug Therapy/
15. therapy.mp. or exp Treatment/
16. overprescrib\$.mp. [mp=title, abstract, heading word, table of contents, key concepts, original title, tests & measures]
17. (tak\$ adj3 medicine\$).mp. [mp=title, abstract, heading word, table of contents, key concepts, original title, tests & measures]
18. (tak\$ adj3 medicine\$).mp. [mp=title, abstract, heading word, table of contents, key concepts, original title, tests & measures]
19. Medicine us\$.mp. [mp=title, abstract, heading word, table of contents, key concepts, original title, tests & measures]
20. taking medicine.mp. [mp=title, abstract, heading word, table of contents, key concepts, original title, tests & measures]
21. (administ\$ adj3 medicine\$).mp. [mp=title, abstract, heading word, table of contents, key concepts, original title, tests & measures]
22. (self adj3 medic\*).mp. [mp=title, abstract, heading word, table of contents, key concepts, original title, tests & measures]
23. (medicine\$ adj manag\$).mp. [mp=title, abstract, heading word, table of contents, key concepts, original title, tests & measures]
24. or/1-23
25. (instrument\$ or tool\$ or scale\* or indicator\$ or technique or method\$ or form\$ or survey\* or questionnaire\$ or self report or measure or (patient adj3 report\$) or outcome measure or PROM or PRO or quantif\$ or rate or rating or assess\$ or evaluat\$ or estimat\$ or develop\$ or valid\$ or reliab\$ or psychometr\$).mp. [mp=title, abstract, heading word, table of contents, key concepts, original title, tests & measures]
26. (patient experience\$ or experienc\$ or view\$ or perception\$ or attitude\$ or belief\$ or concern\$ or worr\$ or burden\$ or (medic\$ adj5 burden\$) or pill burden or problem or distress or (medicin\$ adj3 problem) or (drug adj3 problem) or financial burden or (cost adj3 burden) or psycholog\$ or social activit\$ or family or friend\$ or time or travel or emotion\$ or satisf\$ or dissatisf\$ or happ\$ or unhapp\$ or (cop\$ adj5 medic\$) or (cop\$ adj3 drug\$) or behav\$ or lifestyle or routine or life or activities of daily living).mp. or (\*day/ adj3 lif\$.mp.) or life.mp. or live\$.mp. or health\$.mp. or fitness.mp. or wellbeing.mp. or quality of life.mp. or self care.mp. or impact.mp. [mp=title, abstract, heading word, table of contents, key concepts, original title, tests & measures]
27. patient experience\$.mp. [mp=title, abstract, heading word, table of contents, key concepts, original title, tests & measures]
28. (patient adj3 view\$).mp. [mp=title, abstract, heading word, table of contents, key concepts, original title, tests & measures]

29. (patient adj3 perception\$).mp. [mp=title, abstract, heading word, table of contents, key concepts, original title, tests & measures]
30. (patient adj3 attitude\$).mp. [mp=title, abstract, heading word, table of contents, key concepts, original title, tests & measures]
31. (patient adj5 belief\$).mp. [mp=title, abstract, heading word, table of contents, key concepts, original title, tests & measures]
32. (patient adj5 concern\$).mp. [mp=title, abstract, heading word, table of contents, key concepts, original title, tests & measures]
33. (patient adj5 worry\$).mp. [mp=title, abstract, heading word, table of contents, key concepts, original title, tests & measures]
34. (patient adj5 burden\$).mp. [mp=title, abstract, heading word, table of contents, key concepts, original title, tests & measures]
35. (patient adj5 satisf\$).mp. [mp=title, abstract, heading word, table of contents, key concepts, original title, tests & measures]
36. ((patients\$ adj3 dissatisf\$) or (patient\$ adj5 happ\$) or patient\$ unhapp\$).mp. [mp=title, abstract, heading word, table of contents, key concepts, original title, tests & measures]
37. ((cop\$ adj5 medic\$) or (cop\$ adj5 drug\$) or (medic\$ adj5 behav\$) or (medic\$ adj5 lifestyle) or (medic\$ adj5 routin\$) or (medicine adj5 lif\$) or (medicine\$ adj10 activities of daily living)).mp. or (medicine.mp. adj5 \*day/) or (drug adj5 health\$).mp. or (drug therapy adj10 fitness).mp. or (pharmaceutical therapy adj5 quality of life).mp. or (drug adj5 self care).mp. or (drug\$ adj5 impact).mp. [mp=title, abstract, heading word, table of contents, key concepts, original title, tests & measures]
38. or/27-37
39. 24 and 38
40. 25 and 39
41. limit 40 to (psycarticles journals and adulthood <18+ years> and english and human and yr="1995 -Current")
42. limit 40 to (all journals and 2220 tests & testing and "300 adulthood " and english)
43. limit 40 to (all journals and (2200 psychometrics & statistics & methodology or 2220 tests & testing or 2222 developmental scales & schedules or 2223 personality scales & inventories or 2224 clinical psychological testing or 2225 neuropsychological assessment or 2226 health psychology testing or 2260 research methods & experimental design or 2300 human experimental psychology or 2500 physiological psychology & neuroscience or 2580 psychopharmacology or 2600 psychology & the humanities or 2800 developmental psychology or 3300 health & mental health treatment & prevention or 3310 psychotherapy & psychotherapeutic counseling or 3311 cognitive therapy or 3312 behavior therapy & behavior modification or 3315 psychoanalytic therapy or 3360 health psychology & medicine or "3361 behavioral & psychological treatment of physical illness" or "3363 medical treatment of physical illness" or "3365 promotion & maintenance of health & wellness" or 3370 health & mental health services or 3371 outpatient services or 3373 community & social services or 3900 consumer psychology or 3920 consumer attitudes & behavior) and adulthood <18+ years> and "300 adulthood " and english and human)
44. from 43 keep 31,57
45. limit 43 to (("0400 empirical study" or "0410 experimental replication" or "0430 followup study" or "0450 longitudinal study" or "0451 prospective study" or "0453 retrospective study" or "0600 field study" or "0700 interview" or "0750 focus group" or 1600 qualitative study or 1800 quantitative study) and ("0100 journal" or "0110 peer-reviewed journal" or "0120 non-peer-reviewed journal" or "0130 peer-reviewed status unknown"))
46. limit 45 to ("0400 empirical study" or "0430 followup study" or "0450 longitudinal study" or 1800 quantitative study)
47. limit 46 to 1800 quantitative study

**CINAHL Plus and MEDLINE, 1995-2015 week 16 (accessed via EBSCOHOST)**

| #   | Query                                                                                                                                                                                                                                                                                                                                  | Limiters/Expanders                                                                                                              | Last Run Via                                                                                                  | Results    |
|-----|----------------------------------------------------------------------------------------------------------------------------------------------------------------------------------------------------------------------------------------------------------------------------------------------------------------------------------------|---------------------------------------------------------------------------------------------------------------------------------|---------------------------------------------------------------------------------------------------------------|------------|
| S53 | S50 AND S51                                                                                                                                                                                                                                                                                                                            | Search modes - Find all my search terms                                                                                         | Interface - EBSCOhost Research Databases<br>Search Screen - Advanced Search<br>Database - CINAHL Plus;MEDLINE | 895        |
| S52 | S50 AND S51                                                                                                                                                                                                                                                                                                                            | Search modes - Find all my search terms                                                                                         | Interface - EBSCOhost Research Databases<br>Search Screen - Advanced Search<br>Database - CINAHL Plus;MEDLINE | 1,645      |
| S51 | S2 OR S5 OR S7 OR S13 OR S14                                                                                                                                                                                                                                                                                                           | Search modes - Find all my search terms                                                                                         | Interface - EBSCOhost Research Databases<br>Search Screen - Advanced Search<br>Database - CINAHL Plus;MEDLINE | 9,379,820  |
| S50 | S46 AND S47                                                                                                                                                                                                                                                                                                                            | Limiters - Published Date: 19950101-20151231<br>Search modes - Find all my search terms                                         | Interface - EBSCOhost Research Databases<br>Search Screen - Advanced Search<br>Database - CINAHL Plus;MEDLINE | 5,011      |
| S49 | S46 AND S47                                                                                                                                                                                                                                                                                                                            | Search modes - Find all my search terms                                                                                         | Interface - EBSCOhost Research Databases<br>Search Screen - Advanced Search<br>Database - CINAHL Plus;MEDLINE | 5,331      |
| S48 | S46 AND S47                                                                                                                                                                                                                                                                                                                            | Search modes - Find all my search terms                                                                                         | Interface - EBSCOhost Research Databases<br>Search Screen - Advanced Search<br>Database - CINAHL Plus;MEDLINE | 13,240     |
| S47 | psychometric                                                                                                                                                                                                                                                                                                                           | Expanders - Apply related words; Also search within the full text of the articles<br>Search modes - Find all my search terms    | Interface - EBSCOhost Research Databases<br>Search Screen - Advanced Search<br>Database - CINAHL Plus;MEDLINE | 89,259     |
| S46 | S44 AND S45                                                                                                                                                                                                                                                                                                                            | Search modes - Find all my search terms                                                                                         | Interface - EBSCOhost Research Databases<br>Search Screen - Advanced Search<br>Database - CINAHL Plus;MEDLINE | 1,855,365  |
| S45 | develop*                                                                                                                                                                                                                                                                                                                               | Expanders - Apply related words; Also search within the full text of the articles<br>Search modes - Find all my search terms    | Interface - EBSCOhost Research Databases<br>Search Screen - Advanced Search<br>Database - CINAHL Plus;MEDLINE | 4,230,913  |
| S44 | S42 AND S43                                                                                                                                                                                                                                                                                                                            | Search modes - Find all my search terms                                                                                         | Interface - EBSCOhost Research Databases<br>Search Screen - Advanced Search<br>Database - CINAHL Plus;MEDLINE | 8,527,673  |
| S43 | (instrument\$ or tool\$ or scale* or indicator\$ or technique or method\$ or form\$ or survey* or questionnaire\$ or self report or measure or (patient adj3 report\$) or outcome measure or PROM or PRO or quantif\$ or rate or rating or assess\$ or evaluat\$ or estimat\$ or develop\$ or valid\$ or reliab\$ or psychometr\$).mp. | Expanders - Apply related words; Also search within the full text of the articles<br>Search modes - Find any of my search terms | Interface - EBSCOhost Research Databases<br>Search Screen - Advanced Search<br>Database - CINAHL Plus;MEDLINE | 16,198,585 |
| S42 | S27 AND S41                                                                                                                                                                                                                                                                                                                            | Search modes - Find all my search terms                                                                                         | Interface - EBSCOhost Research Databases<br>Search Screen - Advanced Search<br>Database - CINAHL Plus;MEDLINE | 2,888,057  |
| S41 | S28 OR S29 OR S30 OR S31 OR S32 OR S33 OR S34 OR S35 OR S36 OR S37 OR S38 OR S39 OR S40                                                                                                                                                                                                                                                | Search modes - Find all my search terms                                                                                         | Interface - EBSCOhost Research Databases<br>Search Screen - Advanced Search<br>Database - CINAHL Plus;MEDLINE | 18,831,167 |

|     |                                                                                                                                                                                                                                                                                                                                                                                                                                                                                   |                                                                                                                                 |                                                                                                               |            |
|-----|-----------------------------------------------------------------------------------------------------------------------------------------------------------------------------------------------------------------------------------------------------------------------------------------------------------------------------------------------------------------------------------------------------------------------------------------------------------------------------------|---------------------------------------------------------------------------------------------------------------------------------|---------------------------------------------------------------------------------------------------------------|------------|
| S40 | ((cop\$ adj5 medic\$) or (cop\$ adj5 drug\$) or (medic\$ adj5 behav\$) or (medic\$ adj5 lifestyle) or (medic\$ adj5 routin\$) or (medicine adj5 lif\$) or (medicine\$ adj10 activities of daily living).mp. or (medicine.mp. adj5 *day/) or (drug adj5 health\$).mp. or (drug therapy adj10 fitness).mp. or (pharmaceutical therapy adj5 quality of life).mp. or (drug adj5 self care).mp. or (drug\$ adj5 impact).mp. ((patient\$ adj3 happ\$) or (patient\$ adj3 unhapp\$)).mp. | Expanders - Apply related words; Also search within the full text of the articles<br>Search modes - Find any of my search terms | Interface - EBSCOhost Research Databases<br>Search Screen - Advanced Search<br>Database - CINAHL Plus;MEDLINE | 18,550,078 |
| S39 | ((patient\$ adj3 happ\$) or (patient\$ adj3 unhapp\$)).mp.                                                                                                                                                                                                                                                                                                                                                                                                                        | Expanders - Apply related words; Also search within the full text of the articles<br>Search modes - Find any of my search terms | Interface - EBSCOhost Research Databases<br>Search Screen - Advanced Search<br>Database - CINAHL Plus;MEDLINE | 6,353,850  |
| S38 | (patients\$ adj3 dissatisf\$).mp.                                                                                                                                                                                                                                                                                                                                                                                                                                                 | Expanders - Apply related words; Also search within the full text of the articles<br>Search modes - Find any of my search terms | Interface - EBSCOhost Research Databases<br>Search Screen - Advanced Search<br>Database - CINAHL Plus;MEDLINE | 5,009,958  |
| S37 | (patient adj5 satisf\$).mp.                                                                                                                                                                                                                                                                                                                                                                                                                                                       | Expanders - Apply related words; Also search within the full text of the articles<br>Search modes - Find any of my search terms | Interface - EBSCOhost Research Databases<br>Search Screen - Advanced Search<br>Database - CINAHL Plus;MEDLINE | 6,353,411  |
| S36 | (patient adj3 burden\$).mp.                                                                                                                                                                                                                                                                                                                                                                                                                                                       | Expanders - Apply related words; Also search within the full text of the articles<br>Search modes - Find any of my search terms | Interface - EBSCOhost Research Databases<br>Search Screen - Advanced Search<br>Database - CINAHL Plus;MEDLINE | 6,439,824  |
| S35 | patient adj3 worr\$).mp.                                                                                                                                                                                                                                                                                                                                                                                                                                                          | Expanders - Apply related words; Also search within the full text of the articles<br>Search modes - Find any of my search terms | Interface - EBSCOhost Research Databases<br>Search Screen - Advanced Search<br>Database - CINAHL Plus;MEDLINE | 6,211,145  |
| S34 | (patient adj3 concern\$).mp.                                                                                                                                                                                                                                                                                                                                                                                                                                                      | Expanders - Apply related words; Also search within the full text of the articles<br>Search modes - Find any of my search terms | Interface - EBSCOhost Research Databases<br>Search Screen - Advanced Search<br>Database - CINAHL Plus;MEDLINE | 6,510,950  |
| S33 | (patient adj3 belief\$).mp.                                                                                                                                                                                                                                                                                                                                                                                                                                                       | Expanders - Apply related words; Also search within the full text of the articles<br>Search modes - Find any of my search terms | Interface - EBSCOhost Research Databases<br>Search Screen - Advanced Search<br>Database - CINAHL Plus;MEDLINE | 6,407,809  |
| S32 | (patient adj3 attitude\$).mp.                                                                                                                                                                                                                                                                                                                                                                                                                                                     | Expanders - Apply related words; Also search within the full text of the articles<br>Search modes - Find any of my search terms | Interface - EBSCOhost Research Databases<br>Search Screen - Advanced Search<br>Database - CINAHL Plus;MEDLINE | 6,675,351  |
| S31 | (patient adj3 perception\$).mp                                                                                                                                                                                                                                                                                                                                                                                                                                                    | Expanders - Apply related words; Also search within the full text of the articles<br>Search modes - Find any of my search terms | Interface - EBSCOhost Research Databases<br>Search Screen - Advanced Search<br>Database - CINAHL Plus;MEDLINE | 6,657,219  |
| S30 | (patient adj3 view\$).mp.                                                                                                                                                                                                                                                                                                                                                                                                                                                         | Expanders - Apply related words; Also search within the full text of the articles<br>Search modes - Find any of my search terms | Interface - EBSCOhost Research Databases<br>Search Screen - Advanced Search<br>Database - CINAHL Plus;MEDLINE | 6,576,537  |
| S29 | *doctor patient relation/ or *patient care/ or exp patient attitude/ or *health care quality/ or exp questionnaire/ or patient/ or exp *patient satisfaction/ or patient experience\$.mp. or *psychological aspect/                                                                                                                                                                                                                                                               | Expanders - Apply related words; Also search within the full text of the articles<br>Search modes - Find any of my search terms | Interface - EBSCOhost Research Databases<br>Search Screen - Advanced Search<br>Database - CINAHL Plus;MEDLINE | 13,078,605 |
| S28 | (patient experience\$ or experienc\$ or view\$ or perception\$ or attitude\$ or belief\$ or concern\$ or worr\$ or burden\$ or (medic\$ adj5 burden\$) or pill burden or problem or distress or (medicin\$ adj3 problem) or (drug adj3 problem) or financial burden or (cost adj3 burden) or                                                                                                                                                                                      | Expanders - Apply related words; Also search within the full text of the articles<br>Search modes - Find any of my search terms | Interface - EBSCOhost Research Databases<br>Search Screen - Advanced Search<br>Database - CINAHL Plus;MEDLINE | 17,029,596 |

|     |                                                                                                                                                                                                                                                                                                                                                                                                                                                                                                                                                                                                           |                                                                                                                                 |                                                                                                               |            |
|-----|-----------------------------------------------------------------------------------------------------------------------------------------------------------------------------------------------------------------------------------------------------------------------------------------------------------------------------------------------------------------------------------------------------------------------------------------------------------------------------------------------------------------------------------------------------------------------------------------------------------|---------------------------------------------------------------------------------------------------------------------------------|---------------------------------------------------------------------------------------------------------------|------------|
| S27 | psycholog\$ or social activit\$ or family or friend\$ or time or travel or emotion\$ or satisf\$ or dissatisf\$ or happ\$ or unhapp\$ or (cop\$ adj5 medic\$) or (cop\$ adj3 drug\$) or behav\$ or lifestyle or routine or life or activities of daily living).mp. or (*day/ adj3 lif\$.mp.) or life.mp. or live\$.mp. or health\$.mp. or fitness.mp. or wellbeing.mp. or quality of life.mp. or self care.mp. or impact.mp.<br>S1 OR S2 OR S3 OR S4 OR S5 OR S6 OR S7 OR S8 OR S9 OR S10 OR S11 OR S12 OR S13 OR S14 OR S15 OR S16 OR S17 OR S18 OR S19 OR S20 OR S21 OR S22 OR S23 OR S24 OR S25 OR S26 | Search modes - Find all my search terms                                                                                         | Interface - EBSCOhost Research Databases<br>Search Screen - Advanced Search<br>Database - CINAHL Plus;MEDLINE | 23,635,793 |
| S26 | (medicine\$ adj manag\$).mp.                                                                                                                                                                                                                                                                                                                                                                                                                                                                                                                                                                              | Expanders - Apply related words; Also search within the full text of the articles<br>Search modes - Find any of my search terms | Interface - EBSCOhost Research Databases<br>Search Screen - Advanced Search<br>Database - CINAHL Plus;MEDLINE | 6,311,939  |
| S25 | (self adj3 medic\$).mp.                                                                                                                                                                                                                                                                                                                                                                                                                                                                                                                                                                                   | Expanders - Apply related words; Also search within the full text of the articles<br>Search modes - Find any of my search terms | Interface - EBSCOhost Research Databases<br>Search Screen - Advanced Search<br>Database - CINAHL Plus;MEDLINE | 949,167    |
| S24 | (administ\$ adj3 medicine\$).mp.                                                                                                                                                                                                                                                                                                                                                                                                                                                                                                                                                                          | Expanders - Apply related words; Also search within the full text of the articles<br>Search modes - Find any of my search terms | Interface - EBSCOhost Research Databases<br>Search Screen - Advanced Search<br>Database - CINAHL Plus;MEDLINE | 6,251,710  |
| S23 | (taking adj3 medicine\$).mp.                                                                                                                                                                                                                                                                                                                                                                                                                                                                                                                                                                              | Expanders - Apply related words; Also search within the full text of the articles<br>Search modes - Find any of my search terms | Interface - EBSCOhost Research Databases<br>Search Screen - Advanced Search<br>Database - CINAHL Plus;MEDLINE | 6,436,866  |
| S22 | . (Medicine adj3 us\$).mp.                                                                                                                                                                                                                                                                                                                                                                                                                                                                                                                                                                                | Expanders - Apply related words; Also search within the full text of the articles<br>Search modes - Find any of my search terms | Interface - EBSCOhost Research Databases<br>Search Screen - Advanced Search<br>Database - CINAHL Plus;MEDLINE | 6,532,075  |
| S21 | (tak\$ adj3 medicine\$).mp.                                                                                                                                                                                                                                                                                                                                                                                                                                                                                                                                                                               | Expanders - Apply related words; Also search within the full text of the articles<br>Search modes - Find any of my search terms | Interface - EBSCOhost Research Databases<br>Search Screen - Advanced Search<br>Database - CINAHL Plus;MEDLINE | 6,255,372  |
| S20 | exp Drug Therapy/ or unnecessary medicine\$.mp.                                                                                                                                                                                                                                                                                                                                                                                                                                                                                                                                                           | Expanders - Apply related words; Also search within the full text of the articles<br>Search modes - Find any of my search terms | Interface - EBSCOhost Research Databases<br>Search Screen - Advanced Search<br>Database - CINAHL Plus;MEDLINE | 8,853,981  |
| S19 | (excessive adj3 medicine\$).mp.                                                                                                                                                                                                                                                                                                                                                                                                                                                                                                                                                                           | Expanders - Apply related words; Also search within the full text of the articles<br>Search modes - Find any of my search terms | Interface - EBSCOhost Research Databases<br>Search Screen - Advanced Search<br>Database - CINAHL Plus;MEDLINE | 6,318,996  |
| S18 | exp Polypharmacy/ or exp Prescription Drugs/ or exp Drug Therapy/ or exp Coping Behavior/ or exp Treatment Compliance/ or multiple medicine\$.mp.                                                                                                                                                                                                                                                                                                                                                                                                                                                         | Expanders - Apply related words; Also search within the full text of the articles<br>Search modes - Find any of my search terms | Interface - EBSCOhost Research Databases<br>Search Screen - Advanced Search<br>Database - CINAHL Plus;MEDLINE | 11,814,728 |
| S17 | exp "Medical Treatment (General)" or exp Drug Therapy/ or regular medicine*.mp.                                                                                                                                                                                                                                                                                                                                                                                                                                                                                                                           | Expanders - Apply related words; Also search within the full text of the articles<br>Search modes - Find any of my search terms | Interface - EBSCOhost Research Databases<br>Search Screen - Advanced Search<br>Database - CINAHL Plus;MEDLINE | 8,909,446  |
| S16 | . exp Choice Behavior/ or exp Drug Therapy/ or exp Health Care Costs/ or prescription drug*.mp. or exp Consumer Attitudes/ or exp Consumer Behavior/ or exp Prescription Drugs/ or Physicians/ or Health Promotion/ or exp Drug Usage/                                                                                                                                                                                                                                                                                                                                                                    | Expanders - Apply related words; Also search within the full text of the articles<br>Search modes - Find any of my search terms | Interface - EBSCOhost Research Databases<br>Search Screen - Advanced Search<br>Database - CINAHL Plus;MEDLINE | 14,685,952 |



|     |                                                                                                                                                                                                                                                                                                                                                                                                                                                                                                                                                                                                                            |                                                                                                                                 |                                                                                                               |            |
|-----|----------------------------------------------------------------------------------------------------------------------------------------------------------------------------------------------------------------------------------------------------------------------------------------------------------------------------------------------------------------------------------------------------------------------------------------------------------------------------------------------------------------------------------------------------------------------------------------------------------------------------|---------------------------------------------------------------------------------------------------------------------------------|---------------------------------------------------------------------------------------------------------------|------------|
| S15 | side effect/ or side effect assessment/                                                                                                                                                                                                                                                                                                                                                                                                                                                                                                                                                                                    | Expanders - Apply related words; Also search within the full text of the articles<br>Search modes - Find any of my search terms | Interface - EBSCOhost Research Databases<br>Search Screen - Advanced Search<br>Database - CINAHL Plus;MEDLINE | 8,236,212  |
| S14 | (Drug or medicine) adj3 dos\$.mp.                                                                                                                                                                                                                                                                                                                                                                                                                                                                                                                                                                                          | Expanders - Apply related words; Also search within the full text of the articles<br>Search modes - SmartText Searching         | Interface - EBSCOhost Research Databases<br>Search Screen - Advanced Search<br>Database - CINAHL Plus;MEDLINE | 855        |
| S13 | (Drug or medicine) adj3 dos\$.mp.                                                                                                                                                                                                                                                                                                                                                                                                                                                                                                                                                                                          | Expanders - Apply related words; Also search within the full text of the articles<br>Search modes - Find all my search terms    | Interface - EBSCOhost Research Databases<br>Search Screen - Advanced Search<br>Database - CINAHL Plus;MEDLINE | 0          |
| S12 | exp patient/ or *attitude/ or *attitude to health/ or Drug Us\$ Attitude\$.mp. or exp prescription/                                                                                                                                                                                                                                                                                                                                                                                                                                                                                                                        | Expanders - Apply related words; Also search within the full text of the articles<br>Search modes - Find all my search terms    | Interface - EBSCOhost Research Databases<br>Search Screen - Advanced Search<br>Database - CINAHL Plus;MEDLINE | 676,248    |
| S11 | drug seeking behavior/ or exp drug self administration/                                                                                                                                                                                                                                                                                                                                                                                                                                                                                                                                                                    | Expanders - Apply related words; Also search within the full text of the articles<br>Search modes - Find all my search terms    | Interface - EBSCOhost Research Databases<br>Search Screen - Advanced Search<br>Database - CINAHL Plus;MEDLINE | 8,990      |
| S10 | . *treatment outcome/ or treatment duration/ or *treatment failure/ or exp time to treatment/ or *treatment planning/ or *treatment indication/ or *treatment refusal/ or treatment.mp. or exp treatment contraindication/ or topical treatment/ 12. (prescription adj3 medicine\$.mp. polypharmacy/ or exp drug therapy/                                                                                                                                                                                                                                                                                                  | Expanders - Apply related words; Also search within the full text of the articles<br>Search modes - Find any of my search terms | Interface - EBSCOhost Research Databases<br>Search Screen - Advanced Search<br>Database - CINAHL Plus;MEDLINE | 20,568,797 |
| S9  | polypharmacy/ or exp drug therapy/                                                                                                                                                                                                                                                                                                                                                                                                                                                                                                                                                                                         | Expanders - Apply related words; Also search within the full text of the articles<br>Search modes - Find any of my search terms | Interface - EBSCOhost Research Databases<br>Search Screen - Advanced Search<br>Database - CINAHL Plus;MEDLINE | 8,824,202  |
| S8  | (pharmaceutical adj3 therapy).                                                                                                                                                                                                                                                                                                                                                                                                                                                                                                                                                                                             | Expanders - Apply related words; Also search within the full text of the articles<br>Search modes - Find any of my search terms | Interface - EBSCOhost Research Databases<br>Search Screen - Advanced Search<br>Database - CINAHL Plus;MEDLINE | 5,574,272  |
| S7  | . pharmaceutical therapy.mp.                                                                                                                                                                                                                                                                                                                                                                                                                                                                                                                                                                                               | Expanders - Apply related words; Also search within the full text of the articles<br>Search modes - Find any of my search terms | Interface - EBSCOhost Research Databases<br>Search Screen - Advanced Search<br>Database - CINAHL Plus;MEDLINE | 457,846    |
| S6  | . (therapy adj3 (drug\$ or medic\$)).mp.                                                                                                                                                                                                                                                                                                                                                                                                                                                                                                                                                                                   | Expanders - Apply related words; Also search within the full text of the articles<br>Search modes - Find any of my search terms | Interface - EBSCOhost Research Databases<br>Search Screen - Advanced Search<br>Database - CINAHL Plus;MEDLINE | 8,290,732  |
| S5  | therapy/ or drugs/ or polypharmacy/ or treatment/ or prescription drugs/                                                                                                                                                                                                                                                                                                                                                                                                                                                                                                                                                   | Expanders - Apply related words; Also search within the full text of the articles<br>Search modes - Find any of my search terms | Interface - EBSCOhost Research Databases<br>Search Screen - Advanced Search<br>Database - CINAHL Plus;MEDLINE | 7,659,230  |
| S4  | drug.mp. or exp drug administration/ or exp drug/ or exp drug self administration/ or "drug toxicity and intoxication"/ or adverse drug reaction/ or drug interaction/ or exp repeated drug dose/ or exp "drug use"/ or new drug/ or drug administration route/ or drug underdose/ or topical drug administration/ or generic drug/ or exp drug dosage form/ or exp drug effect/ or multiple drug dose/ or "food and drug administration"/ or food drug interaction/ or exp drug labeling/ or auricular drug administration/ or herb drug interaction/ or low drug dose/ or exp prescription drug/ or long acting drug/ or | Expanders - Apply related words; Also search within the full text of the articles<br>Search modes - Find any of my search terms | Interface - EBSCOhost Research Databases<br>Search Screen - Advanced Search<br>Database - CINAHL Plus;MEDLINE | 17,932,905 |

|    |                                                                                                                                                                                                                                                                                                                            |                                                                                                                                 |                                                                                                               |           |
|----|----------------------------------------------------------------------------------------------------------------------------------------------------------------------------------------------------------------------------------------------------------------------------------------------------------------------------|---------------------------------------------------------------------------------------------------------------------------------|---------------------------------------------------------------------------------------------------------------|-----------|
| S3 | acute drug administration/ or exp drug efficacy/ or exp drug dose/ or drug choice/ or exp chronic drug administration/ or exp "drug cost"/ or drug quality/ or exp recommended drug dose/ or drug potency/ exp patient/ or exp inappropriate prescribing/ or exp prescription/ or prescri\$.mp. or exp treatment planning/ | Expanders - Apply related words; Also search within the full text of the articles<br>Search modes - Find any of my search terms | Interface - EBSCOhost Research Databases<br>Search Screen - Advanced Search<br>Database - CINAHL Plus;MEDLINE | 9,417,571 |
| S2 | medication.mp. or exp drug therapy/                                                                                                                                                                                                                                                                                        | Expanders - Apply related words; Also search within the full text of the articles<br>Search modes - Find any of my search terms | Interface - EBSCOhost Research Databases<br>Search Screen - Advanced Search<br>Database - CINAHL Plus;MEDLINE | 8,822,890 |
| S1 | medicine.mp. or exp medicine/                                                                                                                                                                                                                                                                                              | Expanders - Apply related words; Also search within the full text of the articles<br>Search modes - Find any of my search terms | Interface - EBSCOhost Research Databases<br>Search Screen - Advanced Search<br>Database - CINAHL Plus;MEDLINE | 6,802,884 |
